# Supplementary material for: Host-induced aneuploidy and phenotypic diversification in the Sudden Oak Death pathogen Phytophthora ramorum
Source: PubMed Central journal article supplement (PMC4875591; doi:10.1186/s12864-016-2717-z), 2016-05-20
Supplement: 12864_2016_2717_MOESM9_ESM.pdf [file 12864_2016_2717_MOESM9_ESM.pdf]

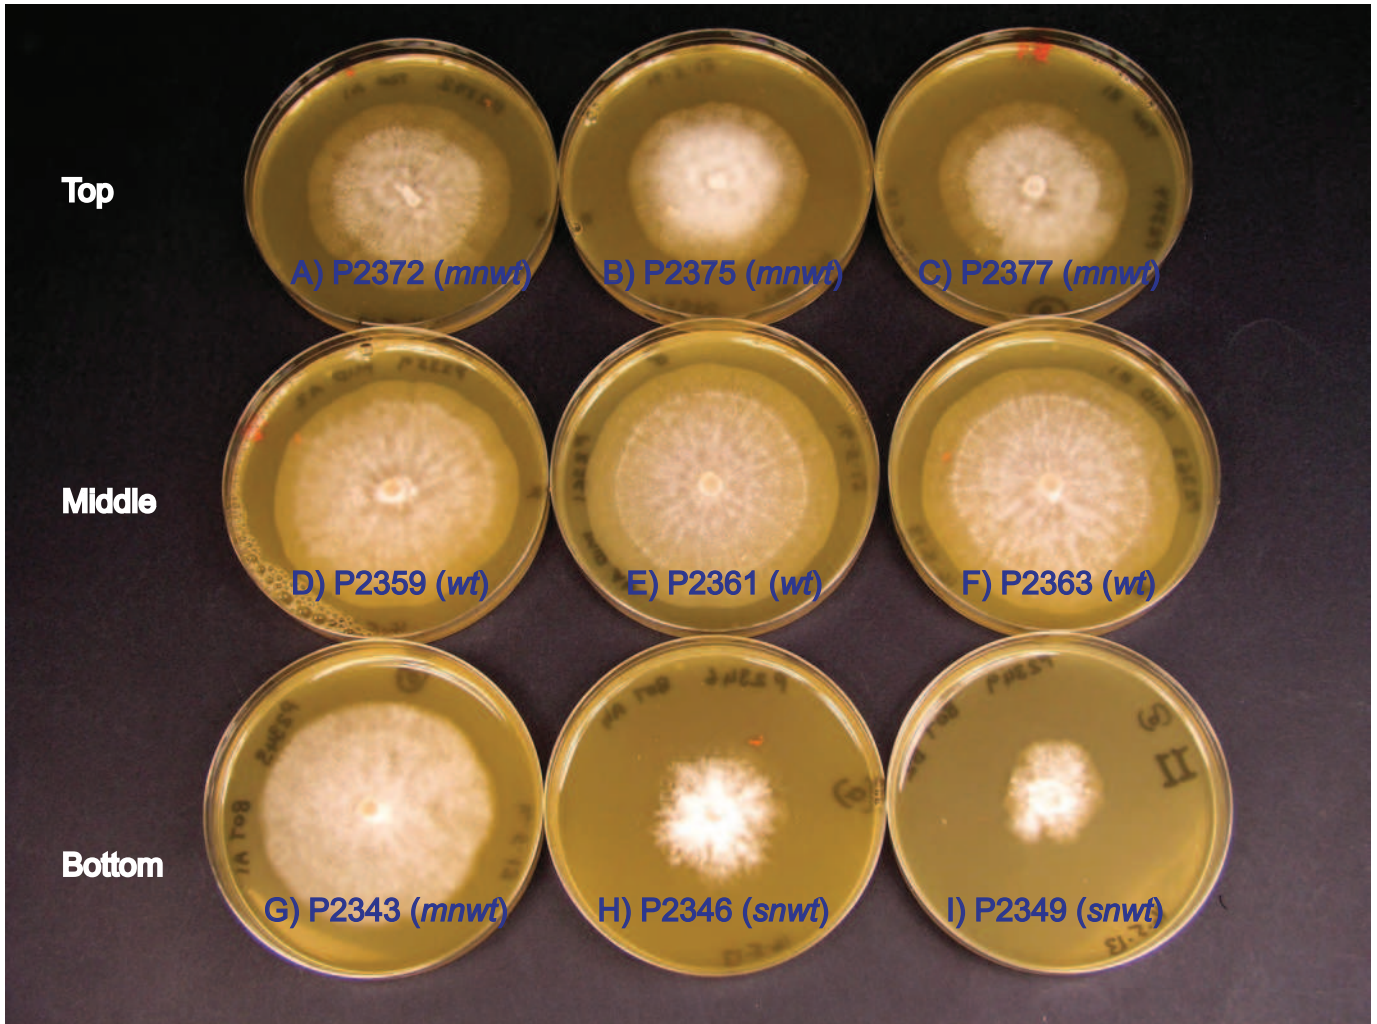

**Additional file 8. *Nwt* colony morphology seen among EU1 isolates obtained from a single 4 meter long lesion on a mature Lawson cypress.** EU1 isolates (A-C) are derived from the top, (D-F) are from the middle, and (G-I) are from the bottom of the lesion. *Mnwt* and *snwt* indicate moderate and severe non-wild types, respectively.
